# Supplementary material
Source: PubMed Central journal article supplement (PMC3422468)
Supplement: cdd201217x1.pdf [file cdd201217x1.pdf]

## Supplementary Figure 1. $\Delta N$ -Aven 180-362 expression inhibits CED-4-induced cell death in yeast

**A.** The *S. pombe* yeast strain HC4, which contains an inducible CED-4 expression construct, was transformed with either *pArt1* empty vector or *pArt1* carrying an ORF coding for Aven aa 180-362 (*pArt1- $\Delta N$ -Aven 180-362*) and subsequently plated on thiamine-free agar plates to induce CED-4 expression (CED-4 on). Phloxin (5  $\mu$ g/ml, Sigma) was added to the agar to reveal dead cells in red. The expression of  $\Delta N$ -Aven 180-362 protected cells against CED-4-killing in yeast (right half), whereas cells transformed with the control vector were killed by CED-4 (left half of the plate). **B.** HC4 yeast growth curves in liquid medium containing (CED-4 off (-)) or lacking (CED-4 on (+)) thiamine. Upon expression of CED-4, empty vector-transformed cells stopped proliferating and died, while  $\Delta N$ -Aven 180-362-transformed cells continued to exhibit exponential growth. The results shown are the mean values of three independent experiments. The bars represent the standard errors. **C.** HC4 yeast cells transformed with either empty vector (*pArt1*) or *pArt1- $\Delta N$ -Aven 180-362* were starved of thiamine (CED-4 on) for the indicated time points. Yeast cells from each experimental group (200 cells each) were then plated on thiamine-containing agar plates to repress again CED-4 expression (CED-4 off). After 48 h, colony numbers were counted and survival was scored as a percentage of the rescued yeast colonies. Empty vector-transformed cells died upon CED-4 expression and failed to proliferate again following CED-4 repression, whereas  $\Delta N$ -Aven 180-362 expression protected yeast cells against CED-4-induced killing. The results shown are the mean values of three independent experiments. The bars represent standard errors with \* and \*\* indicating  $p < 0.05$  and  $p < 0.01$ , respectively.

**A**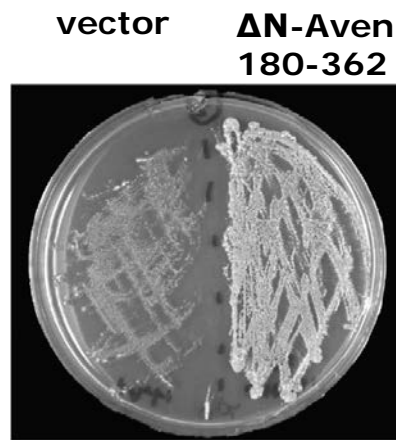**B**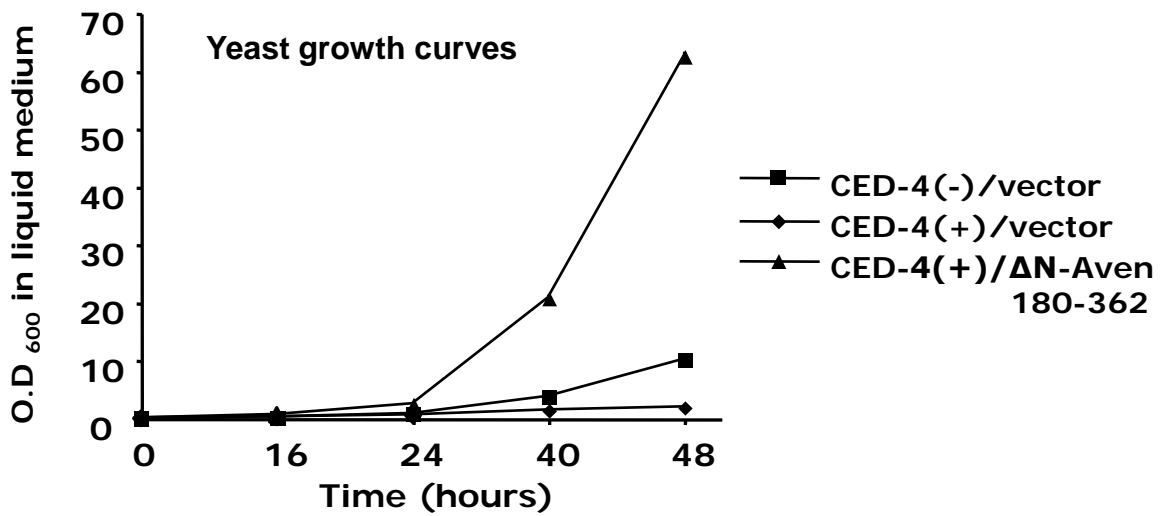**C**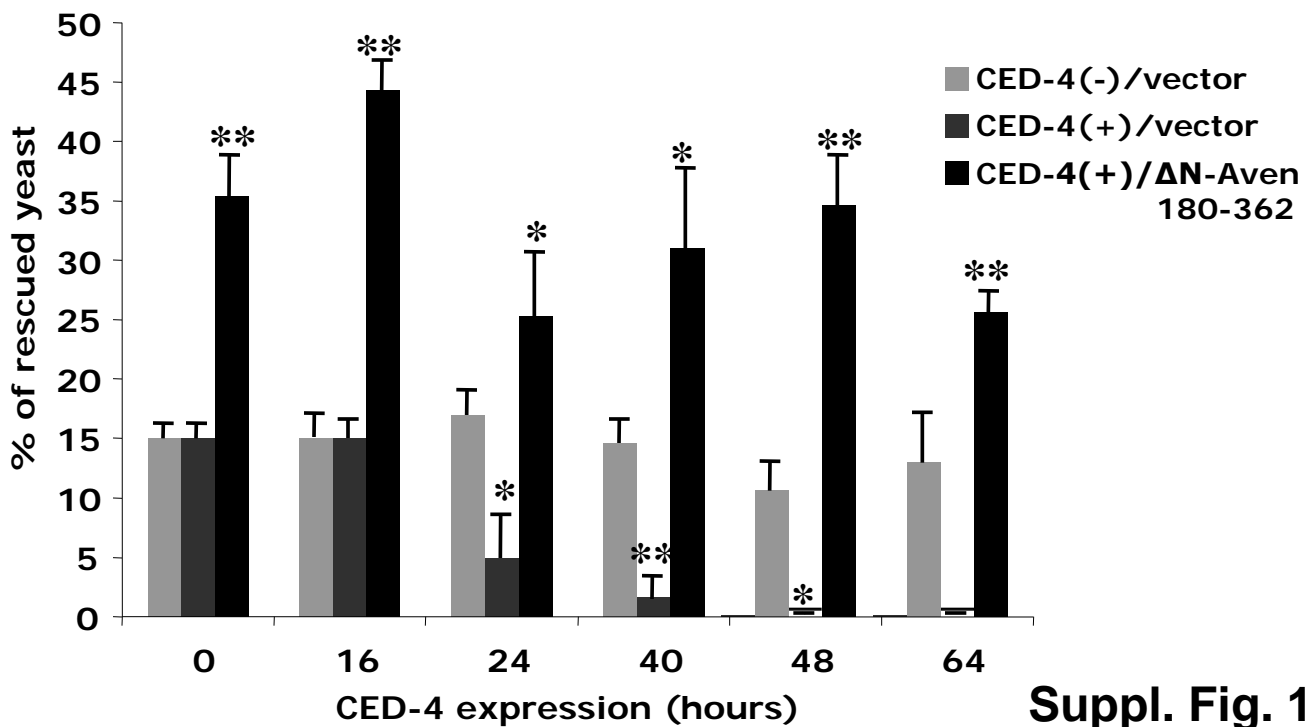**Suppl. Fig. 1**
